# Supplementary material for: The MITOS system predicts long-term survival in amyotrophic lateral sclerosis
Source: HighWire-hosted journal article supplement (doi:10.1136/jnnp-2014-310176), 2015-04-17
Supplement: jnnp-2014-310176supp.pdf [file jnnp-2014-310176supp.pdf]

**Table 1** Functional domains and stages

| ALSFRS domain                                     | Item                                         | Score                                                                      | Functional score* |
|---------------------------------------------------|----------------------------------------------|----------------------------------------------------------------------------|-------------------|
| Movement (walking/self-care) <sup>†</sup>         | 8<br>Walking                                 | 4 Normal                                                                   | 0                 |
|                                                   |                                              | 3 Early ambulation difficulties                                            |                   |
|                                                   |                                              | 2 Walks with assistance                                                    |                   |
|                                                   | <i>OR</i><br>6<br>Dressing and hygiene       | 1 Non-ambulatory functional movement only                                  | 1                 |
|                                                   |                                              | 0 No purposeful leg movement                                               |                   |
|                                                   |                                              | 4 Normal function                                                          |                   |
| Swallowing                                        | 3<br>Swallowing                              | 3 Independent and complete self-care with effort or decreased efficiency   | 0                 |
|                                                   |                                              | 2 Intermittent assistance or substitute methods                            |                   |
|                                                   |                                              | 1 Needs attendant for self-care                                            |                   |
|                                                   |                                              | 0 Total dependence                                                         |                   |
|                                                   | 4 Normal eating habits                       | 1                                                                          |                   |
| 3 Early eating problems; occasional choking       |                                              |                                                                            |                   |
| 2 Dietary consistency changes                     |                                              |                                                                            |                   |
| 1 Needs supplemental tube feeding                 |                                              |                                                                            |                   |
| 0 NPO (exclusively parenteral or enteral feeding) |                                              |                                                                            |                   |
| Communicating <sup>†</sup>                        | 1<br>Speech                                  | 4 Normal speech processes                                                  | 0                 |
|                                                   |                                              | 3 Detectable speech with disturbances                                      |                   |
|                                                   |                                              | 2 Intelligible with repeating                                              |                   |
|                                                   | <i>AND</i><br>4<br>Handwriting               | 1 Speech combined with non-vocal communication                             | 1                 |
|                                                   |                                              | 0 Loss of useful speech                                                    |                   |
|                                                   |                                              | 4 Normal                                                                   |                   |
| Breathing <sup>†</sup>                            | 10<br>Dyspnea                                | 3 Slow or sloppy; all words are legible                                    | 0                 |
|                                                   |                                              | 2 Not all words are legible                                                |                   |
|                                                   |                                              | 1 Able to grip pen but unable to write                                     |                   |
|                                                   | <i>OR</i><br>12<br>Respiratory insufficiency | 0 Unable to grip pen                                                       | 1                 |
|                                                   |                                              | 4 None                                                                     |                   |
|                                                   |                                              | 3 Occurs when walking                                                      |                   |
| ALS-MITOS                                         | Stage                                        | 2 Occurs with one or more of: eating, bathing, dressing                    | 0                 |
|                                                   |                                              | 1 Occurs at rest, difficulty breathing when either sitting or lying        |                   |
|                                                   |                                              | 0 Significant difficulty, considering using mechanical respiratory support |                   |
|                                                   |                                              | 4 None                                                                     |                   |
|                                                   |                                              | 3 Intermittent use of NIPPV                                                |                   |
| ALS-MITOS                                         | Stage                                        | 2 Continuous use of NIPPV during the night                                 | 1                 |
|                                                   |                                              | 1 Continuous use of NIPPV during the night and day                         |                   |
|                                                   |                                              | 0 Invasive mechanical ventilation by intubation or tracheostomy            |                   |
|                                                   |                                              | Functional domains lost                                                    |                   |
|                                                   |                                              | 0 None                                                                     |                   |
|                                                   |                                              | 1 domain                                                                   |                   |
|                                                   |                                              | 2 domains                                                                  |                   |
|                                                   |                                              | 3 domains                                                                  |                   |
|                                                   |                                              | 4 domains                                                                  |                   |
|                                                   |                                              | 5 Death                                                                    |                   |

\*Staging determined by the sum of functional score of 1 for each domain.

<sup>†</sup>Where two items were used, scoring was based on either or both item scores as indicated.

ALSFRS, Amyotrophic Lateral Sclerosis Functional Rating Scale; ALS-MITOS, Amyotrophic Lateral Sclerosis Milano-Torino Staging; NIPPV, nasal intermittent positive pressure ventilation; NPO, nothing by mouth.
